# Supplementary material
Source: PubMed Central journal article supplement (PMC7486333)

**Supplementary Table S1. WHO Progression scale**

|                                     | <b>Descriptor</b>                                                                                                                                | <b>Score</b> |
|-------------------------------------|--------------------------------------------------------------------------------------------------------------------------------------------------|--------------|
| <b>Uninfected</b>                   | Uninfected; non-viral RNA detected                                                                                                               | 0            |
| <b>Ambulatory</b>                   | Asymptomatic; viral RNA detected                                                                                                                 | 1            |
| <b>Ambulatory</b>                   | Symptomatic; Independent                                                                                                                         | 2            |
| <b>Ambulatory</b>                   | Symptomatic; Assistance needed                                                                                                                   | 3            |
| <b>Hospitalized: mild disease</b>   | Hospitalized; No oxygen therapy                                                                                                                  | 4            |
| <b>Hospitalized: mild disease</b>   | Hospitalized; oxygen by mask or nasal prongs                                                                                                     | 5            |
| <b>Hospitalized: severe disease</b> | Hospitalized; oxygen by NIV or High flow                                                                                                         | 6            |
| <b>Hospitalized: severe disease</b> | Intubation and Mechanical ventilation, $O_2/FIO_2 \geq 150$ OR $SpO_2/FIO_2 \geq 200$                                                            | 7            |
| <b>Hospitalized: severe disease</b> | Mechanical ventilation, ( $pO_2/FIO_2 < 150$ OR $SpO_2/FIO_2 < 200$ ) OR vasopressors (norepinephrine $> 0.3 \mu\text{g}/\text{kg}/\text{min}$ ) | 8            |
| <b>Hospitalized: severe disease</b> | Mechanical ventilation, $pO_2/FIO_2 < 150$ AND vasopressors (norepinephrine $> 0.3 \mu\text{g}/\text{kg}/\text{min}$ ), OR Dialysis OR ECMO      | 9            |
| <b>Death</b>                        | Dead                                                                                                                                             | 10           |

**Supplementary Figure S1.** Geographical provenance of COVID-19 patients referred to the in-hospital dialysis unit of Bicêtre University Hospital (APHP)

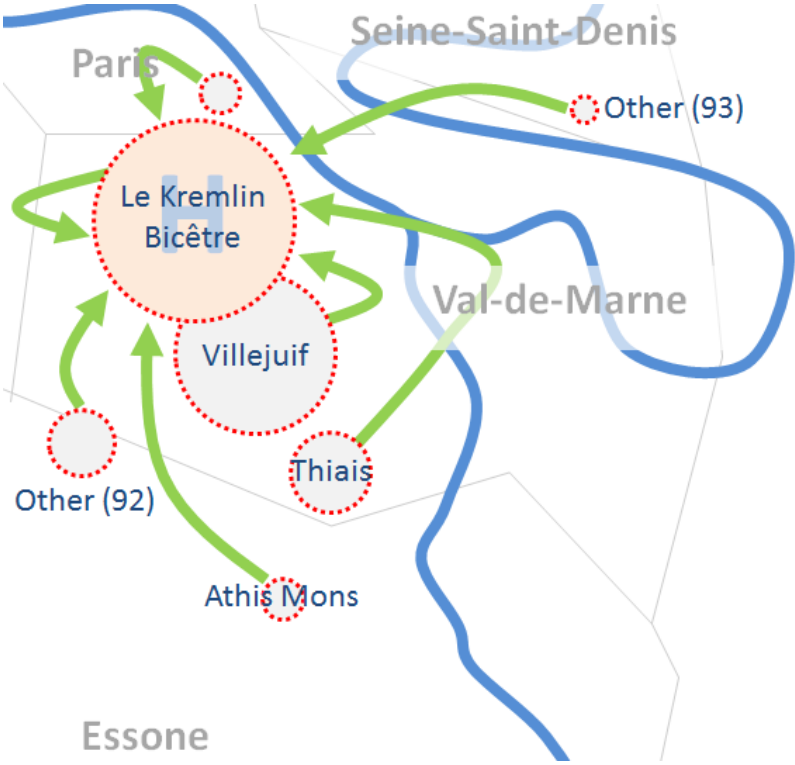

Supplement: mmc1.pdf [file mmc1.pdf]
